# Supplementary material
Source: Royal Society of Chemistry journal article supplement (doi:10.1039/d6dt00873a)
Supplement: d6dt00873a1.pdf [file d6dt00873a1.pdf]

Supporting Information for

Evaluating  $\text{Ce}^{3+} \rightarrow \text{Tb}^{3+} \rightarrow \text{Eu}^{3+}$  cascade sensitization in  
 $\text{LiSrY}_2(\text{BO}_3)_3$  for near-UV excited white emission

*Xining Chen, Rihong Cong,\* Tao Yang\**

College of Chemistry and Chemical Engineering, Chongqing University, Chongqing

401331, People's Republic of China

\*Corresponding authors: [congrihong@cqu.edu.cn](mailto:congrihong@cqu.edu.cn); [taoyang@cqu.edu.cn](mailto:taoyang@cqu.edu.cn)

Table S1. Cell lattice parameters ( $a$ ,  $c$ ,  $V$ ) for  $\text{LiSr}(\text{Y}_{0.99-x}\text{Ce}_{0.01}\text{Tb}_x)_2(\text{BO}_3)_3$  ( $0 \leq x \leq$

0.60) obtained from Le Bail fitting on the powder XRD (space group  $P\bar{3}m1$ )

| $x$                             | $a$ (Å)      | $c$ (Å)     | $V$ (Å <sup>3</sup> ) |
|---------------------------------|--------------|-------------|-----------------------|
| $\text{LiSrY}_2(\text{BO}_3)_3$ | 10.326456(3) | 6.387026(3) | 590.84(4)             |
| 0                               | 10.328750(4) | 6.389453(3) | 590.32(5)             |
| 0.01                            | 10.334310(2) | 6.395179(3) | 591.49(4)             |
| 0.02                            | 10.337464(6) | 6.399243(3) | 592.23(1)             |
| 0.03                            | 10.344801(1) | 6.405210(2) | 593.62(2)             |
| 0.04                            | 10.349964(3) | 6.407862(3) | 594.46(4)             |
| 0.05                            | 10.356403(4) | 6.413693(5) | 595.74(6)             |
| 0.06                            | 10.360590(1) | 6.418460(3) | 596.67(4)             |

Table S2. Cell lattice parameters ( $a$ ,  $c$ ,  $V$ ) for  $\text{LiSr}(\text{Y}_{0.993-m-n}\text{Ce}_{0.007}\text{Tb}_m\text{Eu}_n)_2(\text{BO}_3)_3$  ( $0 \leq$

$m \leq 0.02$ ,  $0 \leq n \leq 0.04$ ) obtained from Le Bail fitting on the powder XRD (space group

$P\bar{3}m1$ )

| $m$  | $n$   | $a$ (Å)      | $c$ (Å)     | $V$ (Å <sup>3</sup> ) |
|------|-------|--------------|-------------|-----------------------|
| 0    | 0     | 10.328010(1) | 6.390140(1) | 590.30(2)             |
| 0.02 | 0.005 | 10.329016(6) | 6.390909(3) | 590.49(2)             |
| 0.02 | 0.01  | 10.329100(3) | 6.391699(4) | 590.57(2)             |
| 0.02 | 0.02  | 10.330510(2) | 6.392964(2) | 590.85(3)             |
| 0.02 | 0.03  | 10.331688(2) | 6.393253(4) | 591.01(2)             |
| 0.02 | 0.04  | 10.332250(3) | 6.395097(3) | 591.25(4)             |

|       |       |              |             |           |
|-------|-------|--------------|-------------|-----------|
| 0.01  | 0.002 | 10.328550(1) | 6.390289(8) | 590.38(1) |
| 0.01  | 0.005 | 10.329057(4) | 6.390620(8) | 590.47(1) |
| 0.005 | 0.005 | 10.329118(2) | 6.389454(1) | 590.37(3) |
| 0.005 | 0.01  | 10.329646(2) | 6.389998(2) | 590.48(3) |

Table S3. Average fluorescence decay lifetime ( $\tau$ ) using double exponential function fitting and so-calculated energy transfer efficiency ( $\eta_{ET}$ ) for  $\text{LiSr}(\text{Y}_{0.99-x}\text{Ce}_{0.01}\text{Tb}_x)_2(\text{BO}_3)_3$  ( $0 \leq x \leq 0.60$ )

| $x$  | $A_1$    | $\tau_1$ (ns) | $A_2$      | $\tau_2$ (ns) | $\tau$ (ns) | $\eta_{ET} = 1 - \tau/\tau_0$ (%) |
|------|----------|---------------|------------|---------------|-------------|-----------------------------------|
| 0    | 9.81E+04 | 4.19278       | 7605.16665 | 11.98687      | 5.61        |                                   |
| 0.10 | 9.22E+06 | 2.40301       | 5928.22139 | 10.69056      | 2.43        | 56.72                             |
| 0.20 | 2.35E+07 | 2.19643       | 5900.16438 | 9.14023       | 2.20        | 60.69                             |
| 0.30 | 5.79E+07 | 2.01103       | 4635.52287 | 8.43517       | 2.01        | 64.09                             |
| 0.40 | 9.70E+07 | 1.88984       | 2475.33818 | 8.11577       | 1.89        | 66.28                             |
| 0.50 | 7.38E+08 | 1.57545       | 1745.14793 | 7.66754       | 1.58        | 71.90                             |
| 0.60 | 9.87E+12 | 0.93746       | 1545.96071 | 7.04652       | 0.94        | 83.28                             |

Table S4. The room-temperature CIE chromaticity coordinates of  $\text{LiSr}(\text{Y}_{0.99-x}\text{Ce}_{0.01}\text{Tb}_x)_2(\text{BO}_3)_3$  ( $0 \leq x \leq 0.60$ ) phosphors

| $x$  | EX (nm) | CIE $x$ | CIE $y$ |
|------|---------|---------|---------|
| 0    | 335     | 0.1602  | 0.0217  |
| 0.10 | 335     | 0.2485  | 0.5005  |

|                                                                 |     |        |        |
|-----------------------------------------------------------------|-----|--------|--------|
| 0.20                                                            | 335 | 0.2593 | 0.5464 |
| 0.30                                                            | 335 | 0.2617 | 0.5568 |
| 0.40                                                            | 335 | 0.2674 | 0.5646 |
| 0.50                                                            | 335 | 0.2638 | 0.5637 |
| 0.60                                                            | 335 | 0.2646 | 0.5630 |
| $\text{LiSr}(\text{Y}_{0.80}\text{Tb}_{0.20})_2(\text{BO}_3)_3$ | 260 | 0.2461 | 0.5672 |

Table S5. The temperature-dependent CIE chromaticity coordinates of  $\text{LiSr}(\text{Y}_{0.79}\text{Ce}_{0.01}\text{Tb}_{0.2})_2(\text{BO}_3)_3$  phosphors

| Temperature(K) | EX (nm) | CIE $x$ | CIE $y$ |
|----------------|---------|---------|---------|
| 303            | 335     | 0.2593  | 0.5464  |
| 333            | 335     | 0.2579  | 0.5483  |
| 363            | 335     | 0.2583  | 0.5488  |
| 393            | 335     | 0.2585  | 0.5484  |
| 423            | 335     | 0.2574  | 0.5500  |
| 453            | 335     | 0.2564  | 0.5504  |
| 483            | 335     | 0.2569  | 0.5504  |

Table S6. Average fluorescence decay lifetime ( $\tau$ ) using double exponential function fitting and so-calculated energy transfer efficiency ( $\eta_{ET}$ ) for  $\text{LiSr}(\text{Y}_{0.995}\text{Tb}_{0.005})_2(\text{BO}_3)_3$ ,  $\text{LiSr}(\text{Y}_{0.985}\text{Tb}_{0.005}\text{Eu}_{0.01})_2(\text{BO}_3)_3$

|                                                                                   | $A_1$     | $\tau_1$ (ns) | $A_2$     | $\tau_2$ (ns) | $\tau$<br>(ns) | $\eta_{ET} = 1 - \tau/\tau_0$ (%) |
|-----------------------------------------------------------------------------------|-----------|---------------|-----------|---------------|----------------|-----------------------------------|
| $\text{LiSr}(\text{Y}_{0.995}\text{Tb}_{0.005})_2(\text{BO}_3)_3$                 | 2359.1111 | 2.7759        | 2702.9163 | 2.4058        | 2.59           |                                   |
| $\text{LiSr}(\text{Y}_{0.985}\text{Tb}_{0.005}\text{Eu}_{0.01})_2(\text{BO}_3)_3$ | 2981.2782 | 2.7668        | 2421.5485 | 1.9537        | 2.47           | 4.67%                             |

Table S7. The room-temperature CIE chromaticity coordinates of  $\text{LiSr}(\text{Y}_{0.993-m-n}\text{Ce}_{0.007}\text{Tb}_m\text{Eu}_n)_2(\text{BO}_3)_3$  ( $0.005 \leq m \leq 0.02$ ,  $0.002 \leq n \leq 0.04$ ) phosphors

| $m$   | $n$   | EX (nm) | CIE $x$ | CIE $y$ | CCT(K) |
|-------|-------|---------|---------|---------|--------|
| 0.02  | 0.005 | 335     | 0.3418  | 0.4643  |        |
| 0.02  | 0.01  | 335     | 0.3548  | 0.4723  |        |
| 0.02  | 0.02  | 335     | 0.3788  | 0.4756  |        |
| 0.02  | 0.03  | 335     | 0.4058  | 0.4690  |        |
| 0.02  | 0.04  | 335     | 0.4218  | 0.4713  |        |
| 0.01  | 0.002 | 335     | 0.3063  | 0.3941  |        |
| 0.01  | 0.005 | 335     | 0.3168  | 0.4052  |        |
| 0.005 | 0.005 | 335     | 0.2957  | 0.3398  |        |
| 0.005 | 0.01  | 335     | 0.3030  | 0.3351  | 6989   |

Table S8. Comparison of key luminescence performance parameters of the present  $\text{LiSrY}_2(\text{BO}_3)_3: \text{Ce}^{3+}/\text{Tb}^{3+}/\text{Eu}^{3+}$  phosphor with other reported single-phase white-emitting phosphors

| Phosphor System                                                                                           | CIE (x, y)          | CCT (K) | CRI | IQE (%) | Thermal stability (@423K) | Ref.      |
|-----------------------------------------------------------------------------------------------------------|---------------------|---------|-----|---------|---------------------------|-----------|
| $\text{LiSrY}_2(\text{BO}_3)_3$<br>( $\text{Ce}^{3+}/\text{Tb}^{3+}/\text{Eu}^{3+}$ )                     | (0.3030,<br>0.3351) | 6989    | 84  | 5.90    | 60.47%                    | This work |
| $\text{YBO}_3$ ( $\text{Ce}^{3+}/\text{Tb}^{3+}/\text{Eu}^{3+}$ )                                         | (0.318,<br>0.337)   | —       | —   | —       | —                         | 1         |
| $\text{Y}_2\text{Si}_2\text{O}_7$ ( $\text{Ce}^{3+}/\text{Tb}^{3+}/\text{Eu}^{3+}$ )                      | (0.327,<br>0.327)   | —       | 85  | 69      | —                         | 2         |
| $\text{Ca}_2\text{MgSi}_2\text{O}_7$<br>( $\text{Ce}^{3+}/\text{Tb}^{3+}/\text{Eu}^{3+}$ )                | (0.345,<br>0.312)   | 4804    | —   | 45.1    | —                         | 3         |
| $\text{Ca}_3\text{Gd}(\text{GaO})_3(\text{BO}_3)_4$<br>( $\text{Ce}^{3+}/\text{Tb}^{3+}/\text{Eu}^{3+}$ ) | (0.346,<br>0.475)   | —       | —   | —       | 55.5%                     | 4         |
| $\text{NaGdF}_4$ ( $\text{Ce}^{3+}/\text{Tb}^{3+}/\text{Eu}^{3+}$ )                                       | (0.32, 0.32)        | —       | —   | —       | —                         | 5         |
| $\text{Na}_5\text{Y}_9\text{F}_{32}$ ( $\text{Ce}^{3+}/\text{Tb}^{3+}/\text{Eu}^{3+}$ )                   | (0.299,<br>0.321)   | 7434    | —   | 15.32   | 89%                       | 6         |
| $\text{Na}_{1.5}\text{Y}_{2.5}\text{F}_9$ ( $\text{Ce}^{3+}/\text{Tb}^{3+}/\text{Eu}^{3+}$ )              | (0.311,<br>0.347)   | 6467.72 | —   | —       | 57.6%                     | 7         |
| $\text{LiY}_6\text{O}_5(\text{BO}_3)_3$<br>( $\text{Bi}^{3+}/\text{Tb}^{3+}/\text{Eu}^{3+}$ )             | (0.323,<br>0.339)   | 5903    | 85  | 5.67    | 64.5%                     | 8         |

|                                                                             |                   |      |   |   |      |    |
|-----------------------------------------------------------------------------|-------------------|------|---|---|------|----|
| NaYGeO <sub>4</sub> (Bi <sup>3+</sup> /Tb <sup>3+</sup> /Eu <sup>3+</sup> ) | (0.336,<br>0.296) | 5205 | — | — | ~60% | 9  |
| LaInO <sub>3</sub> (Bi <sup>3+</sup> /Tb <sup>3+</sup> /Eu <sup>3+</sup> )  | (0.325,<br>0.303) | —    | — | — | —    | 10 |

#### References.

1. S. Kang, Z. K. Yu, Q. R. Tian, M. H. Tai, J. Y. Wang, D. L. Jin, L. C. Wang, *Electron. Mater. Lett.*, 2022, **18**, 540–546.
2. J. Sokolnicki, *J. Lumin.*, 2013, **134**, 600–606.
3. C. W. Ye, *J. Lumin.*, 2019, **213**, 75–81.
4. B. Li, X. Y. Huang, *Ceram. Int.*, 2018, **44**, 4915–4923.
5. J. Liang, T. Fan, J. T. Lu, T. J. Guan, T. T. Deng, B. Y. Xiong, *RSC Adv.*, 2023, **13**, 25681–25690.
6. L. Z. Fang, X. Zhou, H. P. Xia, H. W. Song, B. J. Chen, *Solid State Commun.*, 2022, **357**, 114969.
7. Z. Niu, Q. L. Li, B. C. Yu, Y. Jiang, X. Y. Cai, Y. P. Zhang, *Ceram. Int.*, 2023, **49**, 12540–12550.
8. L. Xiong, T. Yang, R. H. Cong, *J. Solid State Chem.*, 2025, **350**, 125504.
9. E. L. Wang, K. Feng, J. Li, X. D. Zhou, X. K. Sun, *J. Lumin.*, 2022, **250**, 119108.
10. X. W. Hu, F. Piccinelli, M. Bettinelli, *J. Alloys Compd.*, 2022, **899**, 163344.

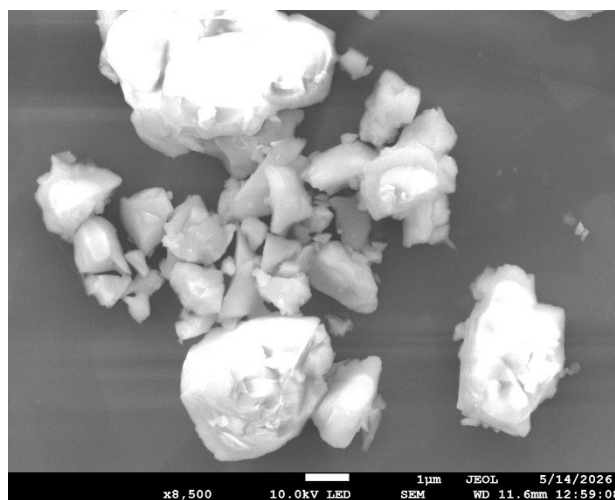

Figure S1. SEM image of  $\text{LiSr}(\text{Y}_{0.978}\text{Ce}_{0.007}\text{Tb}_{0.005}\text{Eu}_{0.01})_2(\text{BO}_3)_3$ .

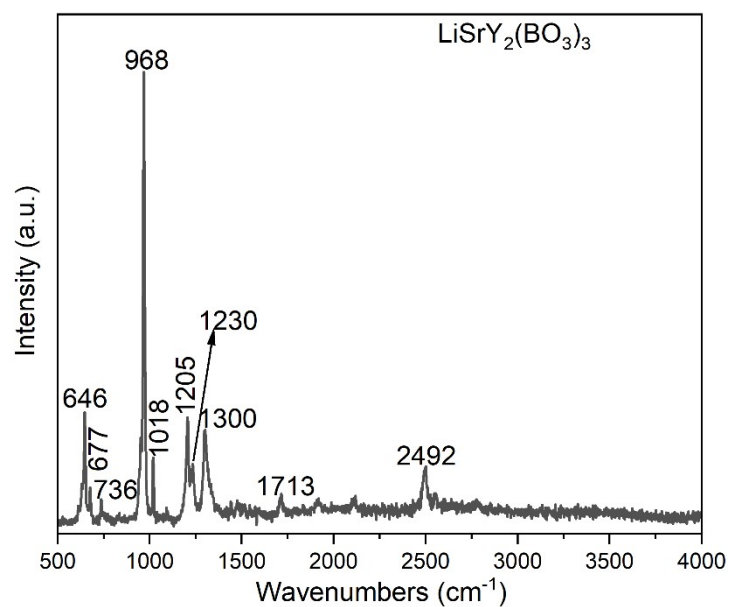

Figure S2. Raman spectrum of  $\text{LiSrY}_2(\text{BO}_3)_3$ .

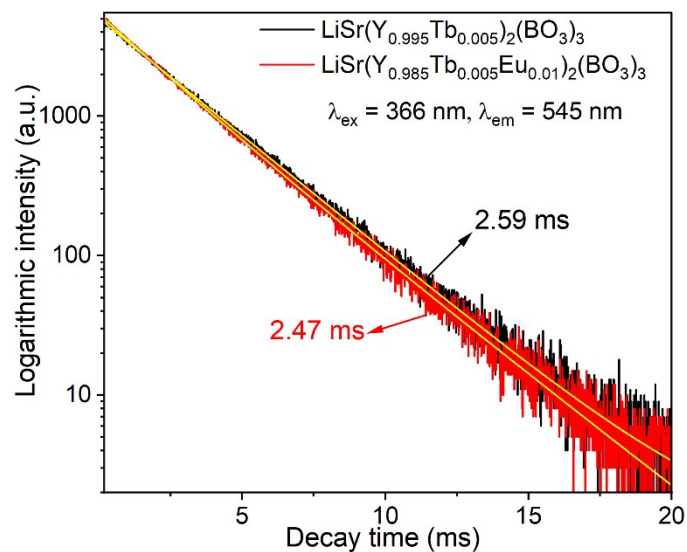

Figure S3. Fluorescent decay curves of  $\text{Tb}^{3+}$  in  $\text{LiSr}(\text{Y}_{0.995}\text{Tb}_{0.005})_2(\text{BO}_3)_3$  and  $\text{LiSr}(\text{Y}_{0.985}\text{Tb}_{0.005}\text{Eu}_{0.01})_2(\text{BO}_3)_3$ .

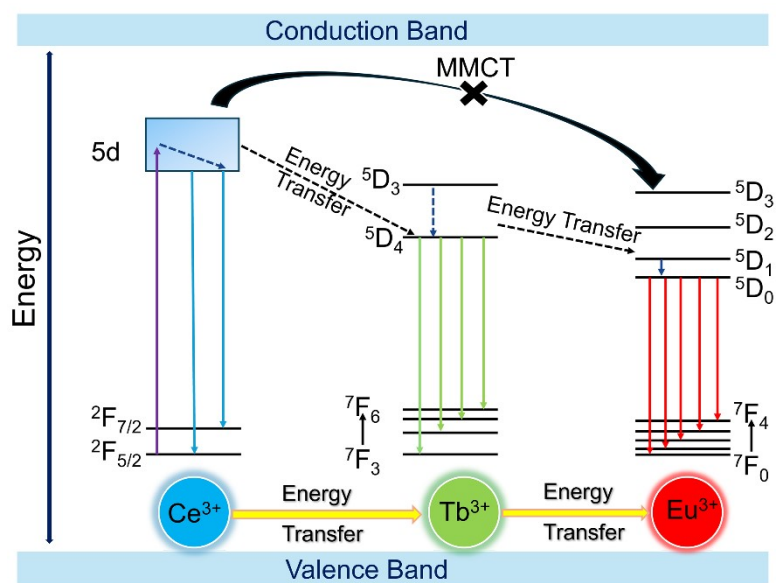

Figure S4. Illustration of energy levels of  $\text{Ce}^{3+}$ ,  $\text{Tb}^{3+}$ ,  $\text{Eu}^{3+}$  ions and  $\text{Ce}^{3+} \rightarrow \text{Tb}^{3+} \rightarrow \text{Eu}^{3+}$  energy transfer mechanism.
